# Supplementary material for: Biochemical and metabolic signatures are fundamental to drought adaptation in PGPR Enterobacter bugandensis WRS7
Source: Royal Society of Chemistry journal article supplement (doi:10.1039/d3mo00051f), 2023-05-29
Supplement: d3mo00051f1.pdf [file d3mo00051f1.pdf]

## Biochemical and metabolic signatures are fundamental in drought adaptation in *Enterobacter bugandensis* WRS7

Saumya Arora<sup>1#</sup>, Piyooosh K Babel<sup>2#</sup> (ORCID: [0000-0003-4280-8465](https://orcid.org/0000-0003-4280-8465)), and Prabhat Nath Jha<sup>1\*</sup> (ORCID: [0000-0002-8486-0969](https://orcid.org/0000-0002-8486-0969))

<sup>1</sup>Department of Biological Sciences, Birla Institute of Technology and Science, Pilani-333031, Rajasthan, India

<sup>2</sup>College of Agriculture, Rani Lakshmi Bai Central Agricultural University, Jhansi 284003, Uttar Pradesh, India

<sup>#</sup>Equally Contributed

### Correspondence:

Dr. Prabhat Nath Jha (Ph.D.)

Professor, Department of Biological Sciences,

*Birla Institute of Technology and Science, Pilani-333031, Rajasthan, India*

Phone: Tel: +91-1596-515755, +91-9983629726 (M)

Email: [prabhatjha@pilani.bits-pilani.ac](mailto:prabhatjha@pilani.bits-pilani.ac)

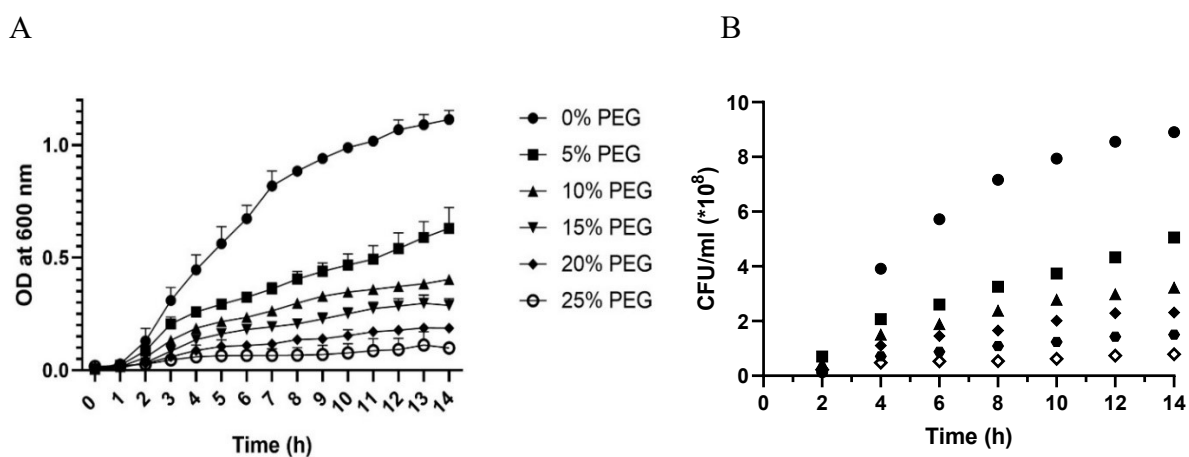

**Figure S1** (A) Growth curve based on the O.D. at 600 nm and (B) CFU based on the number of viable colonies (CFU) present on agar plate, multiplied by dilution factor of *E. bugandensis* WRS7 both under normal (0 % PEG) and osmotic- stressed (5 to 25 % PEG) conditions at an interval of 1 hour. Each point represents mean  $\pm$  SE of 4 replicate samples.

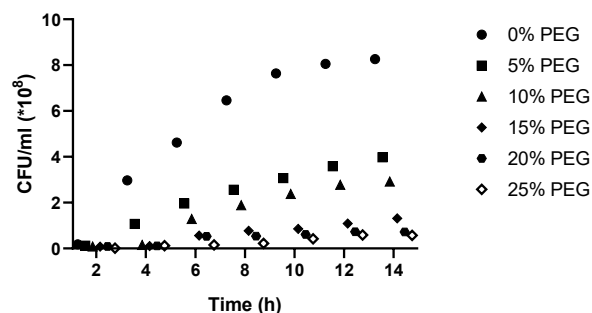

**Figure S2** Growth curve based on the number of viable colonies (CFU) present on agar plate, multiplied by dilution factor of *E. coli* under normal (0 % PEG) and osmotic- stressed (5 to 25 % PEG) conditions at an interval of 1 hour.

**Supplementary Table S1** Membrane fatty acid composition of *Enterobacter bugandensis* WRS7 grown in normal (without PEG) and osmotic- stressed (with 10% PEG) condition. FC= Fold change w. r. t. normal condition (n= 3).

| S. No. | Formula                                        | Compound (methyl ester/ Hydrocarbon)         | Name of fatty acid    | Corresponding Acid | Condition    | FC     |
|--------|------------------------------------------------|----------------------------------------------|-----------------------|--------------------|--------------|--------|
| 1      | C <sub>13</sub> H <sub>26</sub> O <sub>2</sub> | Dodecanoic acid- methyl ester                | Lauric Acid           | C12:0              | Both         | 1.779  |
| 2      | C <sub>15</sub> H <sub>30</sub> O <sub>2</sub> | Tetra decanoic acid- methyl ester            | Myristic Acid         | C14:0              | Both         | -0.985 |
| 3      | C <sub>21</sub> H <sub>42</sub> O <sub>2</sub> | Eicosanoic acid-methyl ester                 | Arachidic acid        | C20:0              | Non-stressed | -2.412 |
| 4      | C <sub>16</sub> H <sub>32</sub> O <sub>2</sub> | Pentadecanoic acid, methyl ester             | Pentadecylic acid     | C15:0              | Both         | 1.897  |
| 5      | C <sub>16</sub> H <sub>32</sub> O <sub>2</sub> | Pentadecanoic acid, 14-methyl-, methyl ester | Isopalmitic acid      | C16:0              | Both         | 0.488  |
| 6      | C <sub>17</sub> H <sub>32</sub> O <sub>2</sub> | Hexadecanoic acid, methyl ester              | Palmitic Acid         | C16:0              | Both         | -1.357 |
| 7      | C <sub>19</sub> H <sub>36</sub> O <sub>2</sub> | 8- octadecenoic acid, methyl Ester           | Oleic Acid            | C18:1              | Both         | -1.07  |
| 8      | C <sub>19</sub> H <sub>38</sub> O <sub>2</sub> | Octadecanoic acid, methyl ester              | Stearic Acid          | C18:0              | Both         | -0.550 |
| 9      | C <sub>19</sub> H <sub>38</sub> O <sub>2</sub> | Heptadecanoic acid, 16-methyl-, methyl ester | Methyl isostearate    | C18:0              | Non-stressed | -2.455 |
| 10     | C <sub>28</sub> H <sub>56</sub> O <sub>2</sub> | Heptacosanoic acid, methyl ester             |                       | C27:0              | Stressed     | 2.497  |
| 11     | C <sub>6</sub> H <sub>12</sub> O <sub>2</sub>  | Pentanoic acid, methyl ester                 | valeric acid          | C5:0               | Stressed     | 2.412  |
| 12     | C <sub>10</sub> H <sub>20</sub> O <sub>3</sub> | 3-Hydroxydecanoic acid                       | 3-hydroxycaproic acid | C10:0              | Stressed     | 2.408  |
| 13     | C <sub>22</sub> H <sub>44</sub> O <sub>2</sub> | Heneicosanoic acid, methyl ester             |                       | C21:0              | Stressed     | 2.392  |
| 14     | C <sub>19</sub> H <sub>36</sub> O <sub>2</sub> | Cyclopentanetriecanoic acid, methyl ester    |                       | C18:0              | Stressed     | 2.459  |
| 15     | C <sub>17</sub> H <sub>34</sub> O              | 9- Heptadecanone                             |                       | C17:0              | Non-stressed | -2.437 |
| 16     | C <sub>30</sub> H <sub>62</sub>                | Triacontane                                  |                       | C30:0              | Both         | -0.624 |
| 17     | C <sub>14</sub> H <sub>30</sub>                | Tetradecane                                  |                       | C14:0              | Both         | -0.875 |
| 18     | C <sub>16</sub> H <sub>34</sub>                | Hexadecane                                   |                       | C16:0              | Stressed     | 2.737  |
| 19     | C <sub>17</sub> H <sub>36</sub>                | Heptadecane                                  |                       | C17:0              | Stressed     | 2.484  |
| 20     | C <sub>22</sub> H <sub>46</sub>                | Docosane                                     |                       | C22:0              | Stressed     | 2.361  |
| 21     | C <sub>12</sub> H <sub>26</sub>                | Dodecane                                     |                       | C12:0              | Stressed     | 2.411  |
| 22     | C <sub>17</sub> H <sub>34</sub>                | 1-Heptadecene                                |                       | C17:1              | Both         | -0.191 |
| 23     | C <sub>19</sub> H <sub>38</sub>                | 1-Nonadecene                                 |                       | C19:1              | Both         | -0.278 |
| 24     | C <sub>20</sub> H <sub>40</sub>                | 9-Eicosene                                   |                       | C20:1              | Stressed     | 2.410  |

|    |                                   |                |  |       |          |        |
|----|-----------------------------------|----------------|--|-------|----------|--------|
| 25 | C <sub>15</sub> H <sub>30</sub>   | 1-Pentadecene  |  | C15:1 | Stressed | 2.494  |
| 26 | C <sub>12</sub> H <sub>26</sub> O | 1-Dodecanol    |  | C12:0 | Both     | -1.502 |
| 27 | C <sub>27</sub> H <sub>56</sub> O | 1-Heptacosanol |  | C27:0 | Both     | -0.336 |
| 28 | C <sub>24</sub> H <sub>50</sub> O | 1-Tetracosanol |  | C24:0 | Both     | 1.206  |
